# Supplementary material
Source: Royal Society of Chemistry journal article supplement (doi:10.1039/d6cp00885b)
Supplement: d6cp00885b1.pdf [file d6cp00885b1.pdf]

# Large valleys splitting under biaxial strain in Janus

## SHfAX<sub>2</sub> (A=Si, Ge; X=N, P, As)

Yang Zhang<sup>1</sup>, Cheng-long Wu<sup>1</sup>, Lu-jun Wei<sup>1</sup>, Hong Wu<sup>1</sup>, Yin-juan Ren<sup>1</sup>, Sha-sha Li<sup>1†</sup>,  
Xiang-yan Bo<sup>1†</sup> and Feng Li<sup>1†</sup>

<sup>1</sup>School of Science, Nanjing University of Posts and Telecommunications (NJUPT),  
Nanjing 210046, China

Yang Zhang and Cheng-long Wu contributed equally to this work.

†Corresponding Author:

Email addresses: [shashali@njupt.edu.cn](mailto:shashali@njupt.edu.cn)

Email addresses: [Boxiangyan@njupt.edu.cn](mailto:Boxiangyan@njupt.edu.cn)

Email addresses: [lifeng@njupt.edu.cn](mailto:lifeng@njupt.edu.cn)

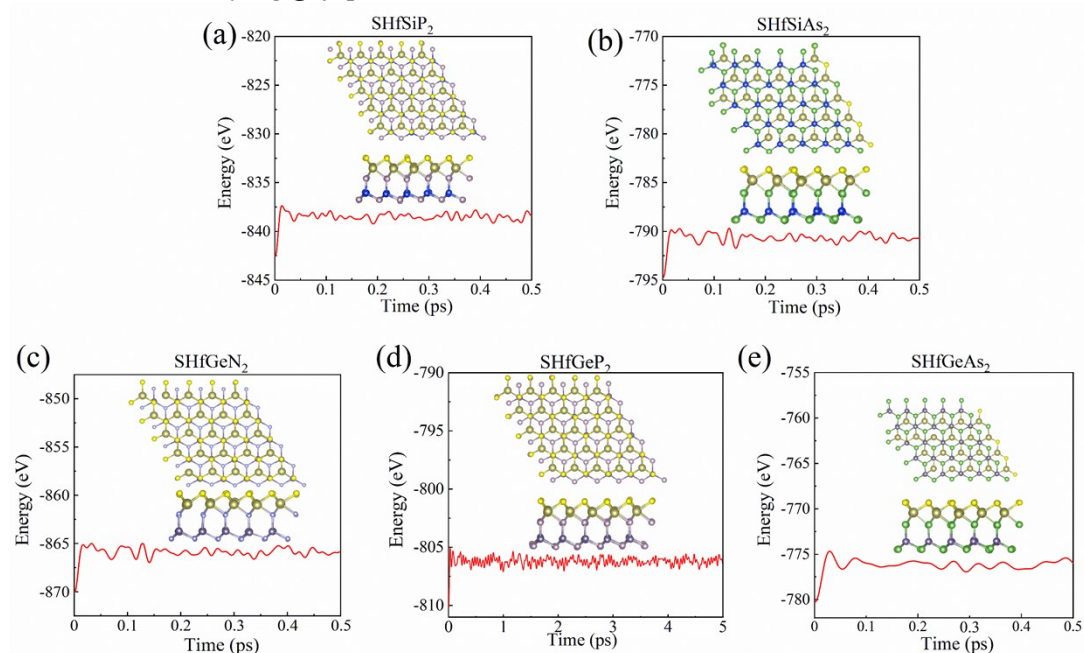

Support **Figure 1**. Variation of the energy as a function of time for the Janus SHfAX<sub>2</sub> monolayers at 500K. The insets are the top and side views of the structure at the end of the AIMD simulation.

†Corresponding author. E-mail: [shashali@njupt.edu.cn](mailto:shashali@njupt.edu.cn)

†Corresponding author. E-mail: [Boxiangyan@njupt.edu.cn](mailto:Boxiangyan@njupt.edu.cn)

†Corresponding author. E-mail: [lifeng@njupt.edu.cn](mailto:lifeng@njupt.edu.cn)

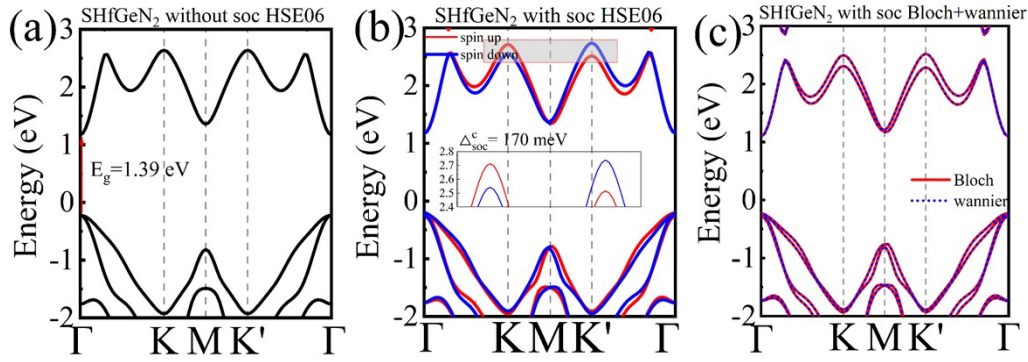

Support **Figure 2**. The electron energy band diagram of 1L SHfGeN<sub>2</sub> along the high symmetry point (a) without considering SOC; (b) with considering SOC; (c) The red dashed line obtained from the Bloch, while the blue dashed line is derived from the Wannier functions with considering SOC. the Fermi energy is set to zero.

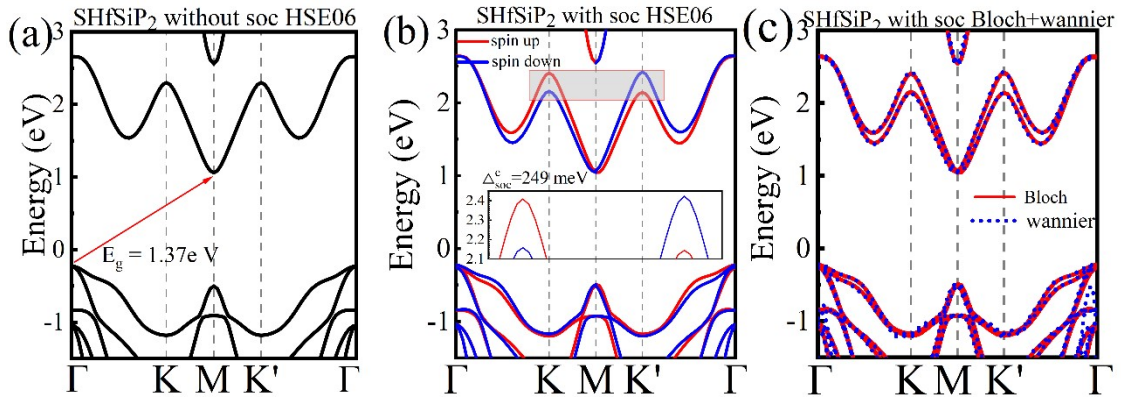

Support **Figure 3**. The electron energy band diagram of 1L SHfSiP<sub>2</sub> along the high symmetry point (a) without considering SOC; (b) with considering SOC; (c) The red dashed line obtained from the Bloch, while the blue dashed line is derived from the Wannier functions with considering SOC. the Fermi energy is set to zero.

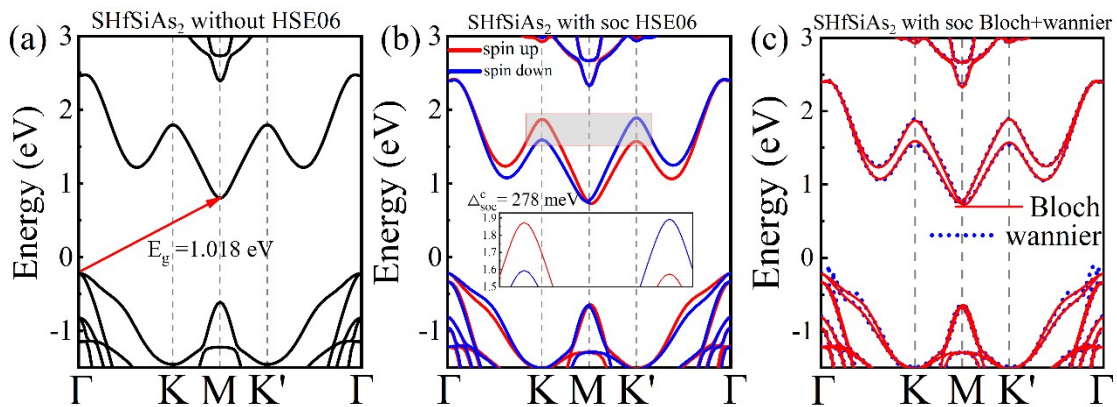

Support **Figure 4**. The electron energy band diagram of 1L SHfSiAs<sub>2</sub> along the high symmetry point (a) without considering SOC; (b) with considering SOC; (c) The red dashed line obtained from the Bloch, while the blue dashed line is derived from the Wannier functions with considering SOC. the Fermi energy is set to zero.

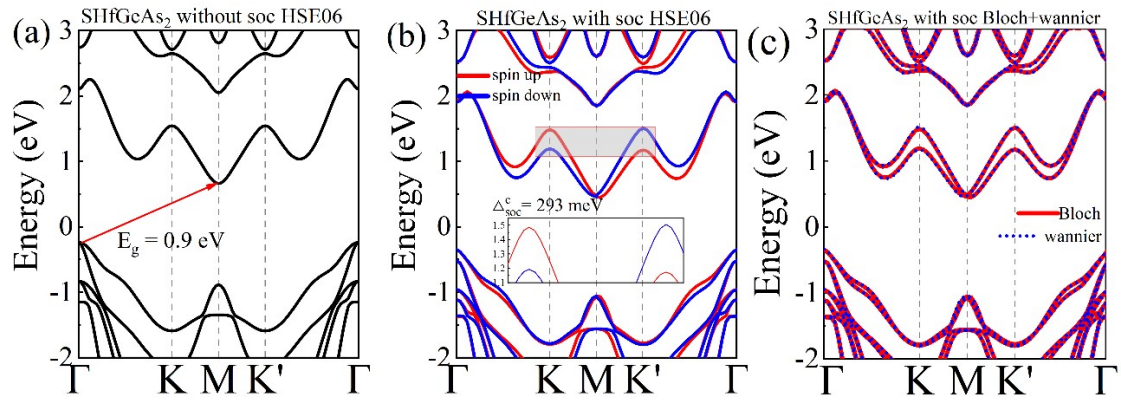

Support **Figure 5**. The electron energy band diagram of 1L SHfGeAs<sub>2</sub> along the high symmetry point (a) without considering SOC; (b) with considering SOC; (c) The red dashed line obtained from the Bloch, while the blue dashed line is derived from the Wannier functions with considering SOC. the Fermi energy is set to zero.

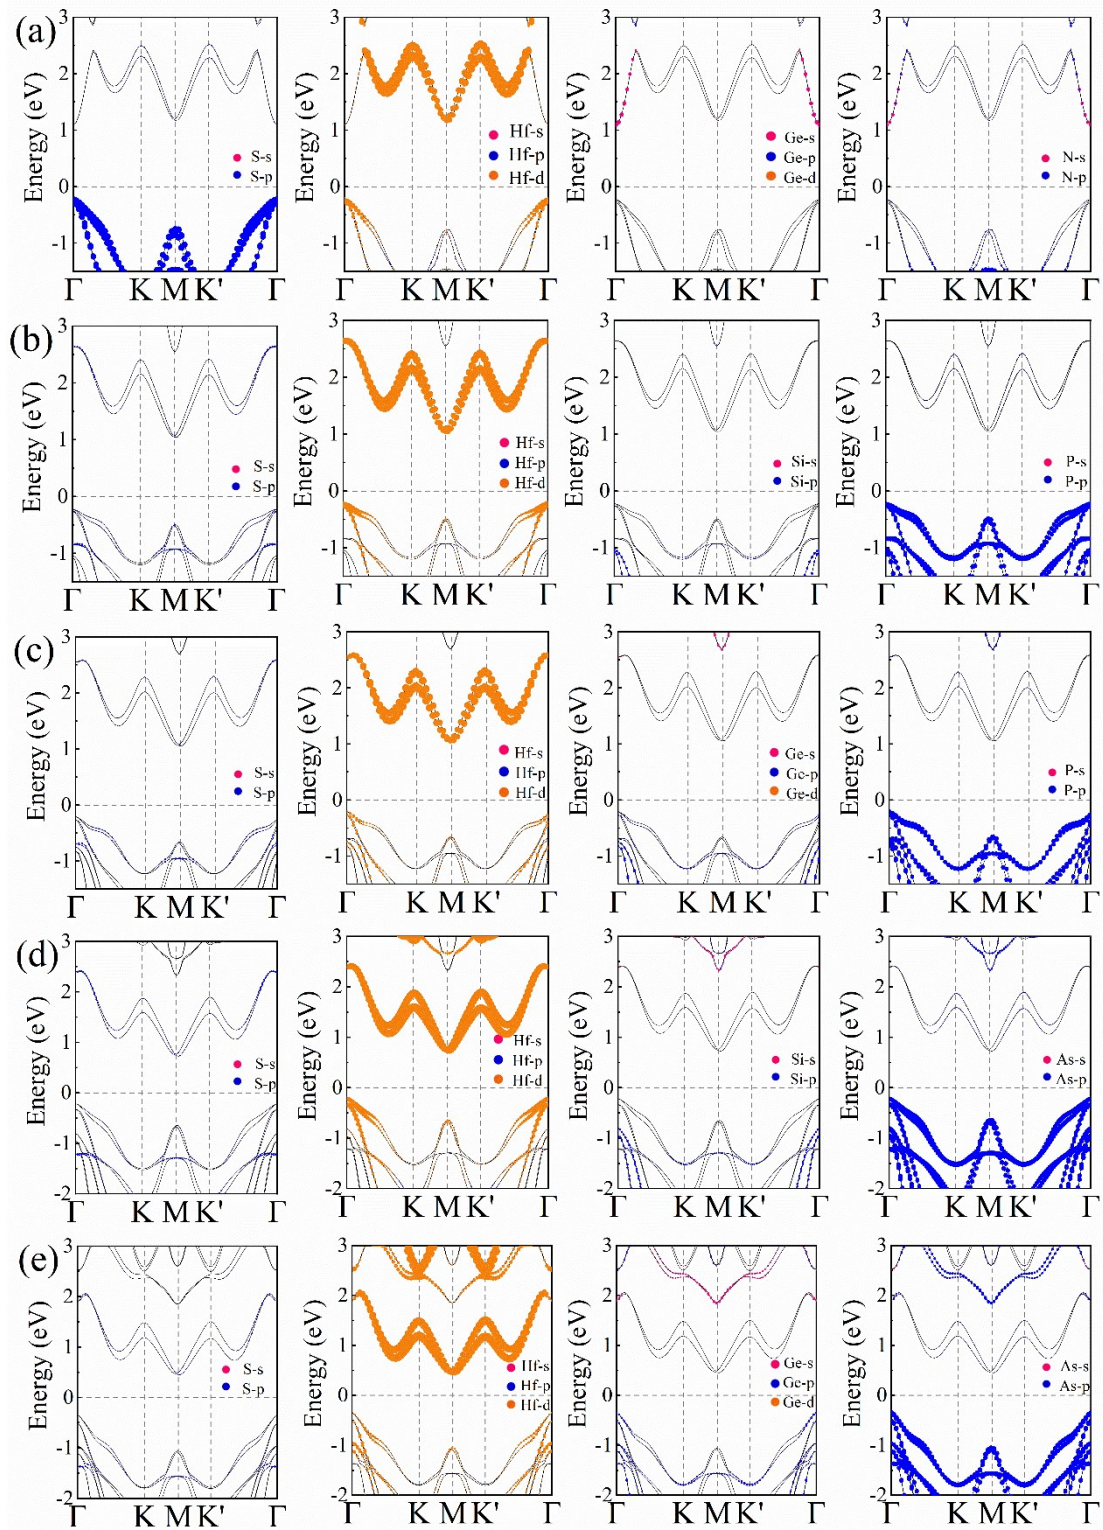

Support **Figure 6.** (a-e) The projected energy band diagram of SHfGeN<sub>2</sub>, SHfSiP<sub>2</sub>, SHfGeP<sub>2</sub>, SHfSiAs<sub>2</sub> and SHfGeAs<sub>2</sub> the *S-s*, *S-p* orbitals; *Hf-s*, *Hf-p*, *Hf-d* orbitals; *Ge-s*, *Ge-p* orbitals; *N-s*, *N-p* orbitals.

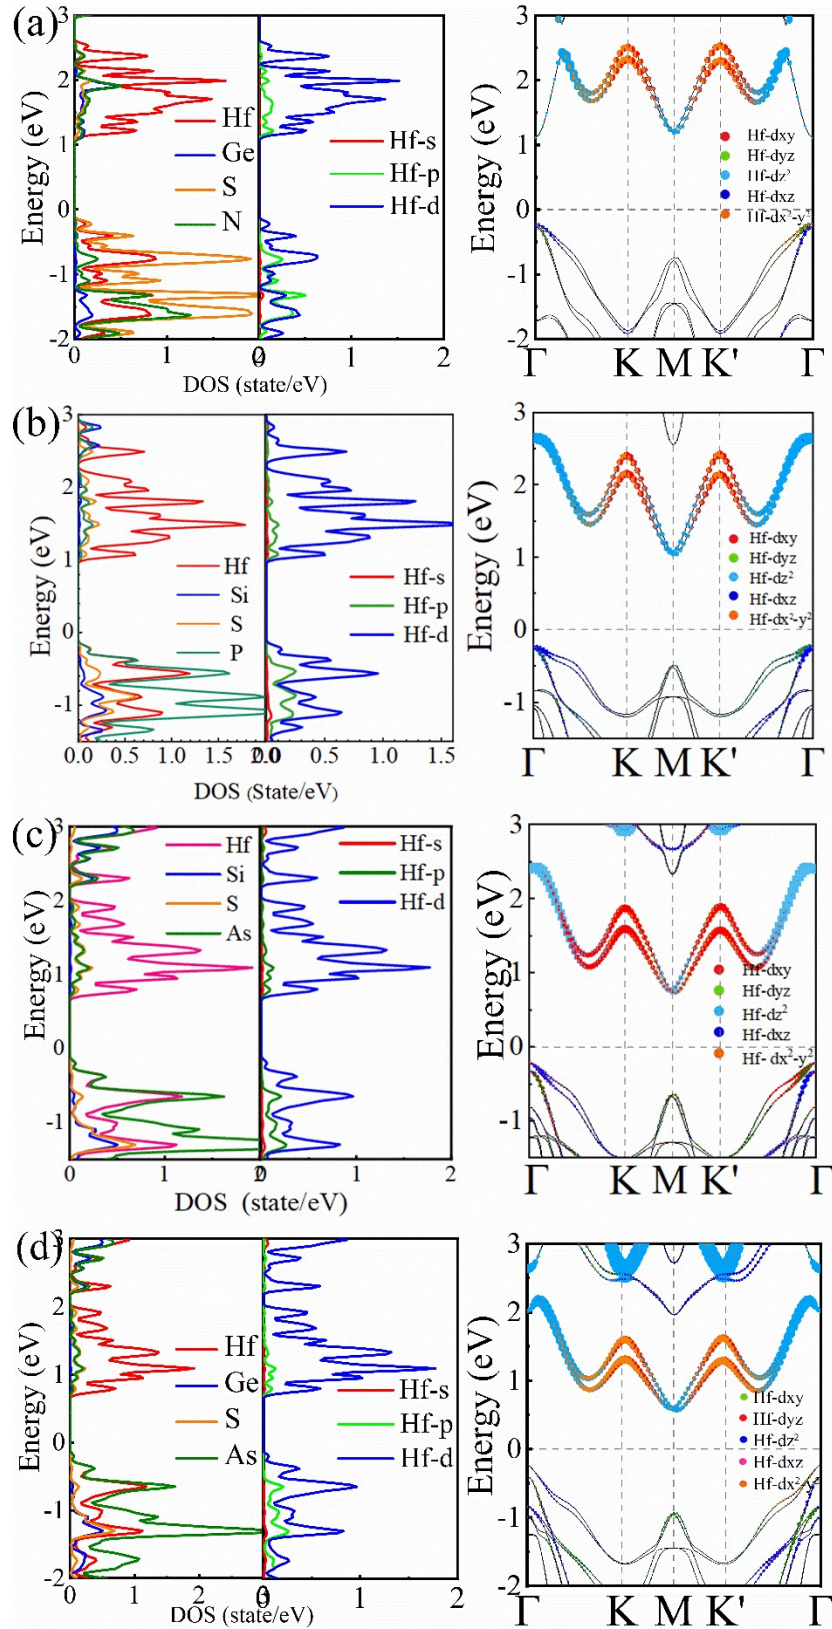

Support **Figure 7**. The left is total density of states of each atom of 1L SHfSiN<sub>2</sub>(a) SHfSiP<sub>2</sub> (b), SHfSiAs<sub>2</sub>(c), SHfGeAs<sub>2</sub>(d), and the middle projected density of states of the *s*, *p*, *d* orbitals of Hf atom, the right is projected energy band diagram of the *d* orbitals of the Hf atom in two-dimensional, where the *d*<sub>xy</sub>, *d*<sub>x<sup>2</sup>-y<sup>2</sup></sub>, *d*<sub>z<sup>2</sup></sub>, *d*<sub>yz</sub>, *d*<sub>xz</sub> orbitals of Hf is in red, green, light blue, dark blue, orange.

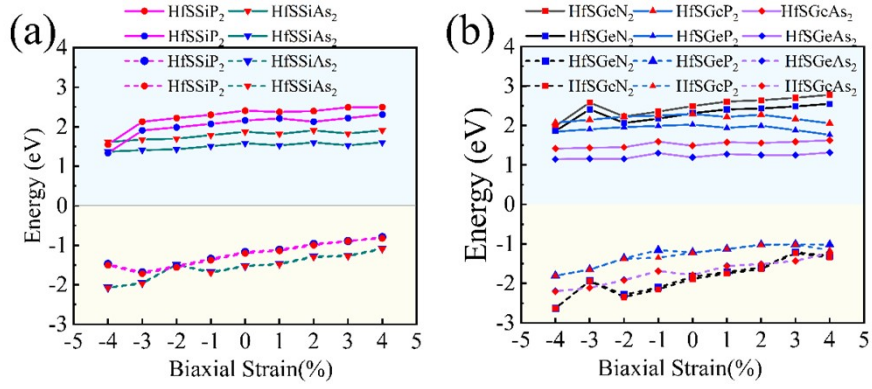

Support **Figure 8**. The actual curves of valence in a and conduction band energies in b at the K point of 1L SHfAX<sub>2</sub>. And the y-axis is the energy minus the vacuum level. Red dots represent spin-up, blue dots represent spin-down, dashed lines indicate the conduction band, and solid lines indicate the valence band.
